# Supplementary material for: Metabolomic and transcriptomic signatures of prenatal excessive methionine support nature rather than nurture in schizophrenia pathogenesis
Source: PubMed Central journal article supplement (PMC7393105; doi:10.1038/s42003-020-01124-8), 2020-07-30
Supplement: 42003_2020_1124_MOESM2_ESM.pdf [file 42003_2020_1124_MOESM2_ESM.pdf]

## Descriptions of Additional Supplementary Files

**Supplementary Data 1.** Gene differential expressions in the brains of newborn SAL vs MET mice

**Supplementary Data 2.** Top meta pathways, gene-gene enrichment in the brains of the newborn MET pups

**Supplementary Data 3.** Genes whose expressions were changed in MET brains and occur in metabolites whose levels were changed in MET brains

**Supplementary Data 4.** Common genes in MET mice and human Schizophrenia and Autism

**Supplementary Data 5.** Source data underlying the graphs
