# Supplementary material for: Metabolomic and transcriptomic signatures of prenatal excessive methionine support nature rather than nurture in schizophrenia pathogenesis
Source: PubMed Central journal article supplement (PMC7393105; doi:10.1038/s42003-020-01124-8), 2020-07-30
Supplement: 42003_2020_1124_MOESM7_ESM.pdf [file 42003_2020_1124_MOESM7_ESM.pdf]

### Source data underlying the graphs

Supplementary data 5, source data for Figure 1: a, b, c: Maternal behavior of SAL and MET mothers

| a. Pups retrieval latency |     | b. Pups retrieval duration |     | c. Nest quality score |     |
|---------------------------|-----|----------------------------|-----|-----------------------|-----|
| SAL                       | MET | SAL                        | MET | SAL                   | MET |
| 44                        | 16  | 98                         | 51  | 4                     | 4   |
| 17                        | 12  | 61                         | 36  | 3.5                   | 4.5 |
| 11                        | 17  | 30                         | 77  | 4                     | 3   |
| 8                         | 32  | 38                         | 120 | 4.5                   | 3.5 |
| 12                        | 16  | 62                         | 92  | 4                     | 3   |

Supplementary data 5, source data for Figure 1e: Locomotor Activity

| SAL→SAL | MET→MET  | SAL→MET | MET→SAL |
|---------|----------|---------|---------|
| 2529.52 | 3703.6   | 2720.99 | 3640.25 |
| 3871.88 | 10808.83 | 2260.47 | 5777.77 |
| 3340.75 | 3189.16  | 1397.75 | 8087.99 |
| 3855.05 | 7287.93  | 3589.64 | 6565.62 |
| 5765.09 | 8126.37  | 1953.09 | 5254.19 |
| 4519.13 | 6753.05  | 4786.89 | 6551.21 |
| 4459.98 | 9790.09  | 5747.96 | 9557.18 |
|         | 3758.96  | 2895.25 | 9188.2  |
|         |          | 3804.51 | 9809.96 |

Supplementary data 5, source data for Figure 1f: Prepulse inhibition (PPI)

| PPI   | Group   | Mean  | Std. Deviation | Std. Error of Mean |
|-------|---------|-------|----------------|--------------------|
| 68 dB | SAL→SAL | 43.47 | 17.52          | 5.284              |
|       | MET→MET | 24.98 | 20.98          | 5.82               |
|       | SAL→MET | 36.72 | 16.91          | 3.527              |
|       | MET→SAL | 16.73 | 11             | 2.592              |
| 71 dB | SAL→SAL | 53.09 | 24.5           | 7.386              |
|       | MET→MET | 30.79 | 29.63          | 8.219              |
|       | SAL→MET | 51.26 | 17.85          | 3.644              |
|       | MET→SAL | 29.52 | 15.81          | 3.727              |
| 77 dB | SAL→SAL | 72.81 | 11.7           | 3.701              |
|       | MET→MET | 51.7  | 18.98          | 5.479              |
|       | SAL→MET | 68.98 | 15.91          | 3.247              |
|       | MET→SAL | 50.91 | 17.5           | 4.243              |

Supplementary data 5, source data for Figure 1g, T-maze: Alternation %

| SAL→SAL | MET→MET | SAL→MET | MET→SAL |
|---------|---------|---------|---------|
| 57.1    | 57.1    | 42.9    | 71.4    |
| 85.7    | 57.1    | 71.4    | 28.6    |
| 85.7    | 14.3    | 71.4    | 14.3    |
| 57.1    | 57.1    | 42.9    | 57.1    |
| 71.4    | 57.1    | 57.1    | 57.1    |
| 85.7    | 42.9    | 71.4    | 85.7    |
| 57.1    | 57.1    | 57.1    | 57.1    |
| 71.4    | 57.1    | 57.1    | 14.3    |
| 57.1    | 71.4    | 42.9    | 14.3    |
| 71.4    | 28.6    | 100     | 14.3    |
| 71.4    | 28.6    | 85.7    | 42.9    |
| 71.4    | 57.1    | 71.4    | 14.3    |
| 71.4    | 42.9    | 42.9    | 28.6    |
| 85.7    | 42.9    | 42.9    |         |

Supplementary data 5, source data for Figure 1h, T-maze: Decision latency

| SAL→SAL | MET→MET | SAL→MET | MET→SAL |
|---------|---------|---------|---------|
| 7.5     | 9.5     | 6.8     | 7.1     |
| 9.1     | 7.6     | 5.5     | 7.6     |
| 10.4    | 9.4     | 12.8    | 30.3    |
| 7.8     | 8.9     | 9.9     | 6.1     |
| 16.6    | 10.4    | 6.9     | 11.1    |
| 7.5     | 10      | 5.8     | 5.8     |
| 8.9     | 9       | 6.8     | 16.9    |
| 12.8    | 9.3     | 7.3     | 11      |
| 5.6     | 15.1    | 6.3     | 13.1    |
| 5.8     | 5.8     | 7.6     | 8.5     |
| 7.3     | 8.9     | 10.5    | 4.5     |
| 14.1    | 10.9    | 24      | 6.5     |
| 5.3     | 8.5     | 8.5     | 9.8     |
| 6.8     | 13.9    | 6.6     |         |
